# Supplementary material for: 3D imaging of undissected optically cleared Anopheles stephensi mosquitoes and midguts infected with Plasmodium parasites
Source: PubMed Central journal article supplement (PMC7494115; doi:10.1371/journal.pone.0238134), 2020-09-16

**Figure S1**

**A**

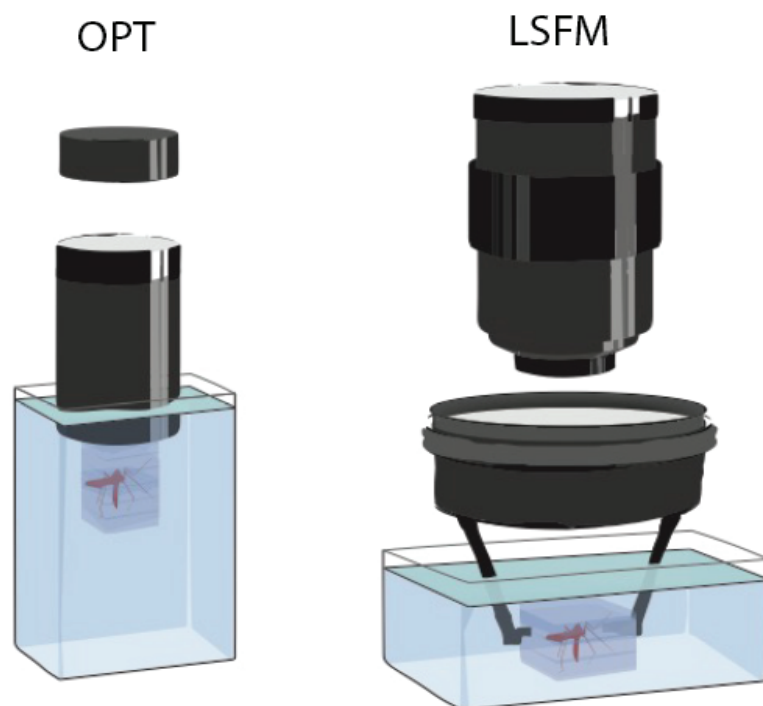

**B**

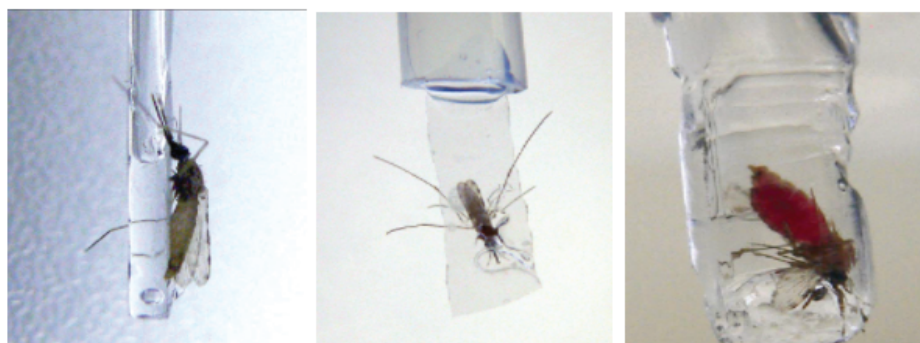

**C**

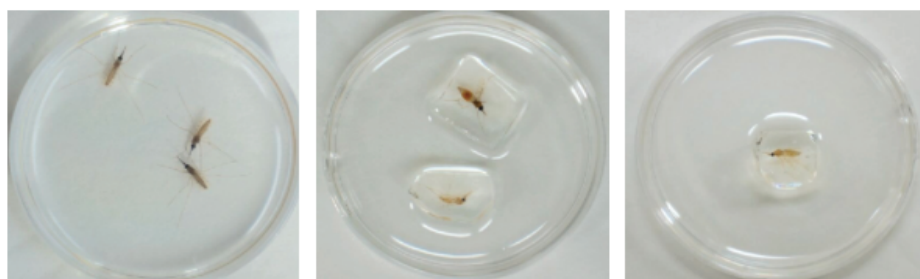

Supplement: pone.0238134.s001.pdf [file pone.0238134.s001.pdf]
