# Supplementary material for: 3D imaging of undissected optically cleared Anopheles stephensi mosquitoes and midguts infected with Plasmodium parasites
Source: PubMed Central journal article supplement (PMC7494115; doi:10.1371/journal.pone.0238134), 2020-09-16

**Figure S2**

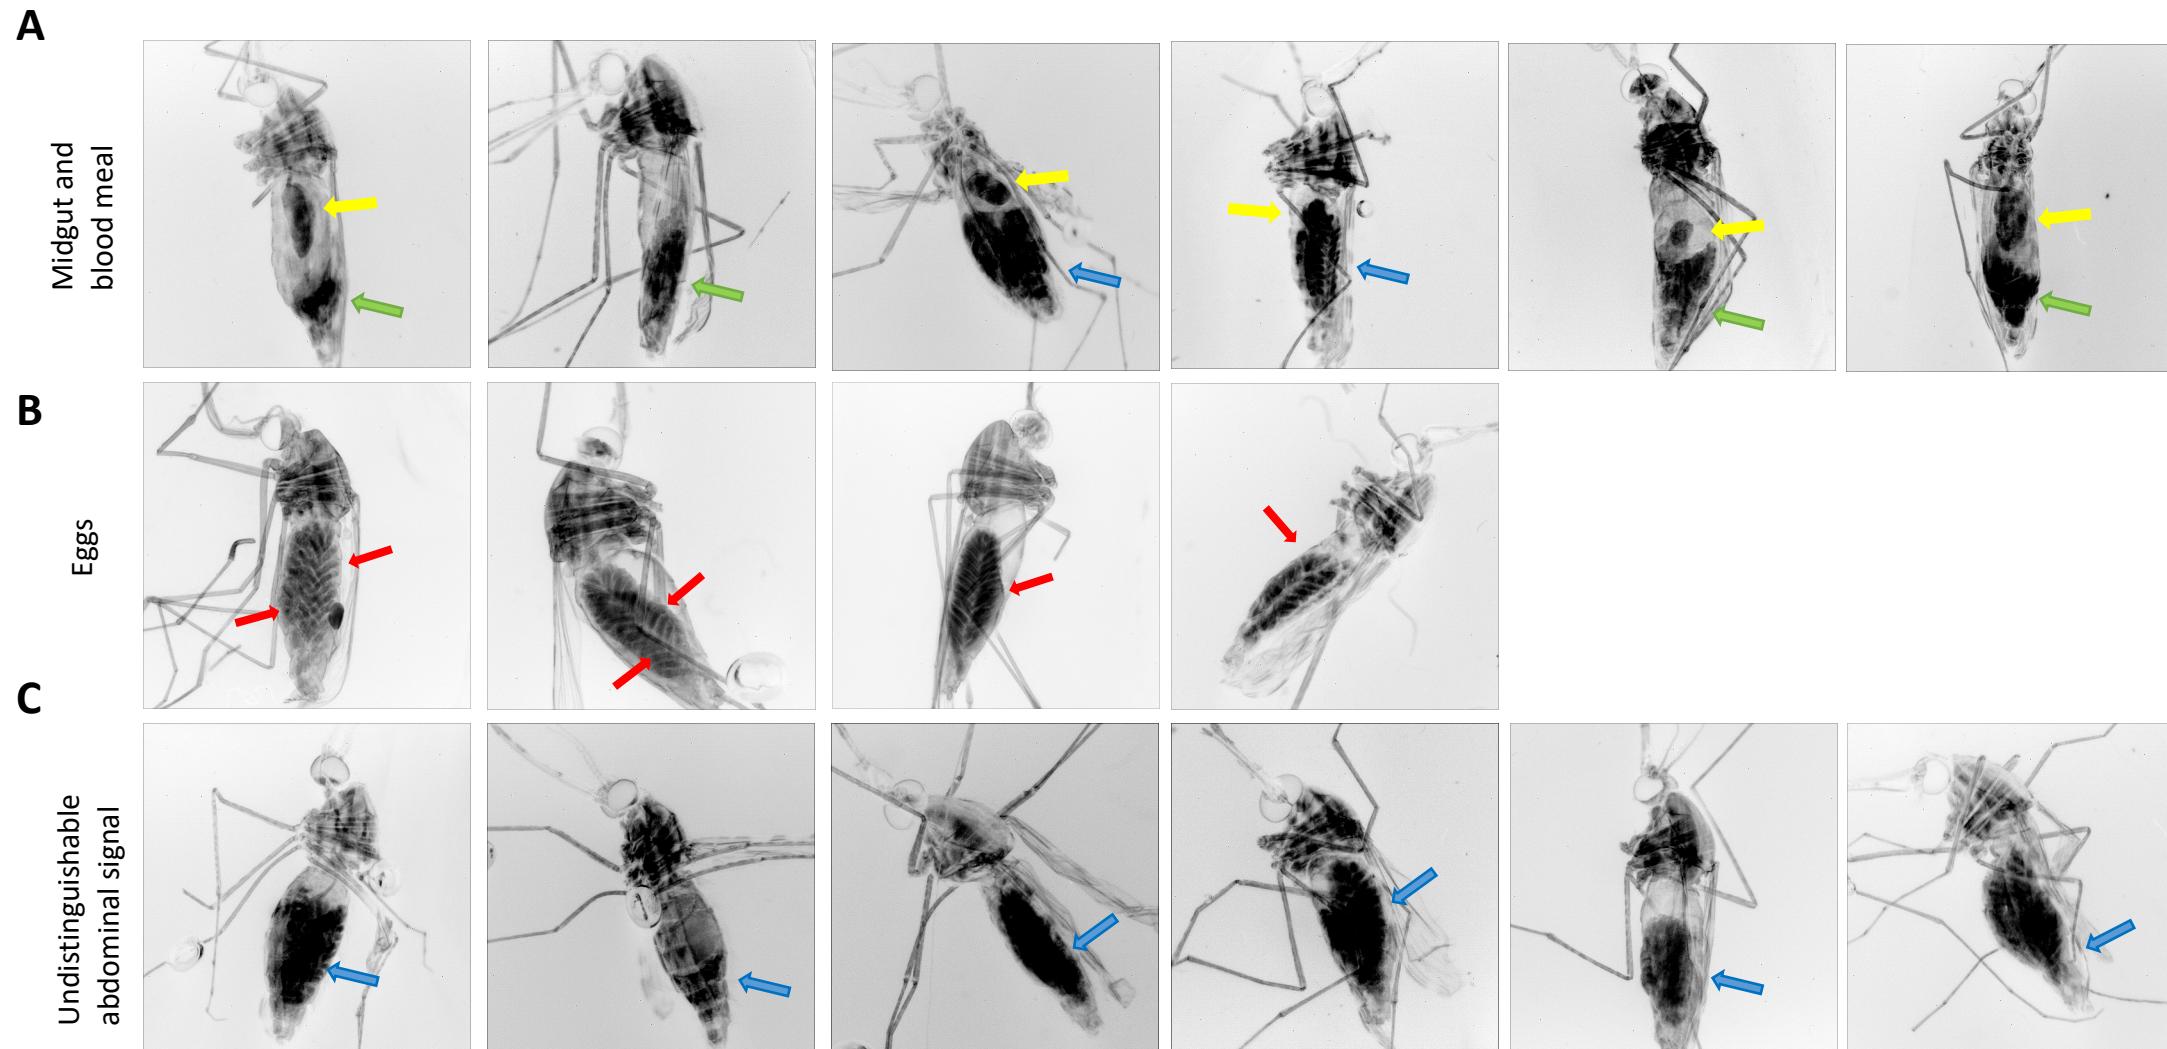

Supplement: pone.0238134.s002.pdf [file pone.0238134.s002.pdf]
